# Supplementary material for: Effectiveness of Ammonia Reduction on Control of Fine Particle Nitrate
Source: Copernicus journal article supplement (doi:10.5194/acp-2018-378), 2018-05-08
Supplement: Supplementary file [file acp-2018-378-AC2-supplement.pdf]

We thank the referees for their thoughtful and constructive comments. We have addressed the comments (numbered, below), with referee comments in quotes and italics, and our responses in plain text.

## Referee #2

Major comments:

1. *“The authors introduce a new conceptual framework to explain seasonal and regional differences in the sensitivity of particulate matter to ammonia emissions. This has potential policy implications and it would be useful for the authors to compare with other techniques that have been used previously to highlight potential differences.*

*In particular, previous studies have used the gas-ratio from Ansari and Pandis to interpret global model results (see for instance Pinder et al. (2007, 2008), Paulot (2016), Pozzer et al., 2017)  $GR = (TNH4 - 2*TSO4)/TNO3$  with  $0 < GR < 1$  indicating sensitivity to  $NH_x$  and  $GR > 1$  indicating sensitivity to  $NH_3$ .*

*Obviously, this cannot directly address variations associated with seasonality. However, based on the information provided in Table S1,  $GR_{<1}$  only for SE US, Virginia, and Pasadena. In other words the weak sensitivity of nitrate to ammonia emissions at the other sites could be inferred simply from concentrations, which is consistent with the findings of the studies mentioned earlier.*

*In addition, many global models do not use ISORROPIA but simpler (cheaper) aerosol thermodynamic models (see for instance Bellouin et al (2011), Hauglustaine (2014)). Such schemes, which do not explicitly account for aerosol pH, will also simulate a nonlinear response of ammonium nitrate to changes in a ammonia emissions (see equation A8 in Bellouin et al (2011)). It would be useful for the authors to show how different the response of nitrate and ammonium to changes in ammonia/NOx emissions (i.e., Fig 5) would be using such approach.*

*In particular, this would help strength the case for thinking in terms of aerosol pH rather than simply in terms of concentrations.”*

The reviewer raises an important and very broad question. First we note that global models use aerosol thermodynamic modules of all levels of complexity (some not at all). All these models would predict some degree of nonlinearity because one of the precursors,  $NH_3$  or  $HNO_3$ , become limiting. Our point is that using pH to look at the sensitivity of nitrate to the precursors is new. It makes things simpler and provides a more fundamental understanding of the processes involved. Furthermore, even if the models have the correct thermodynamics they can still get the sensitivity wrong due to a biased predicted pH, as we note with the reference to Vasilakos et al. (2018). We feel that the degree to which each implementation differs, and how it compares with the usage of pH as a control parameter requires a dedicated publication in itself.

We have added some text to try and clarify these points. The next now reads:

“Large-scale models to assess effectiveness of NH<sub>3</sub> control requires good predictions of a range of pertinent emissions and sinks (NH<sub>3</sub>, NO<sub>x</sub>, SO<sub>2</sub>, and nonvolatile cations), and accurate representation of their applicable atmospheric chemical processes. Thermodynamic modules of different levels of complexity are then applied to determine sensitivities to the precursors (e.g., NH<sub>3</sub>, HNO<sub>3</sub>). In some cases (Pozzer et al., 2017), the aerosol pH is explicitly determined with an embedded thermodynamic model, such as ISORROPIA-II (Fountoukis and Nenes, 2007). Due to the complexities from all these factors, chemical transport model-predicted responses to changing emissions may not align with observations. For example, the sensitivity of PM<sub>2.5</sub> pH in the Community Multiscale Air Quality (CMAQ) simulations to the mass of crustal material apportioned to the PM<sub>2.5</sub> size range can have important effects on anticipated responses to these changing emission trends. Vasilakos et al. (2018) have shown that including too much crustal material in PM<sub>2.5</sub> results in a predicted increasing trend in both aerosol pH and concentrations of NH<sub>4</sub>NO<sub>3</sub>, which is counter to observations (Weber et al., 2016).

Overall, calculating aerosol pH is a more accurate approach that provides a fundamental understanding of the factors controlling HNO<sub>3</sub>-NO<sub>3</sub><sup>-</sup> partitioning and therefore enables a direct evaluation of different studies. Furthermore, it is also useful to determine aerosol pH since it has broad application to many other important aerosol processes. For instance, pH is a mediator of many heterogeneous chemical processes, including various acid-catalyzed reactions (Jang et al., 2002; Eddingsaas et al., 2010; Surratt et al., 2010), gas-particle partitioning of species other than HNO<sub>3</sub> and NH<sub>3</sub>, such as organic acids and halogens (Fridlind and Jacobson, 2000; Young et al., 2013; Guo et al., 2017; Nah et al., 2018), and solubility of metals and other nutrient species (Meskhidze et al., 2003; Nenes et al., 2011; Longo et al., 2016; Stockdale et al., 2016; Fang et al., 2017).

In this study, we apply a more direct approach, where measured gas and particle concentrations and the thermodynamic model ISORROPIA-II are used directly in a sensitivity analysis to evaluate the effectiveness of NH<sub>3</sub> emission controls on fine particle mass relative to NO<sub>x</sub> control. Contrasts are made between sites that have a wide range in NH<sub>3</sub> concentrations and aerosol composition, ...”

2. *“I am not convinced by the current discussion of the impact of NH<sub>3</sub> emissions controls on nitrogen deposition. The authors argue that lowering aerosol pH (via lower NH<sub>3</sub> emissions) will modify the ratio of reduced to oxidized nitrogen deposition. However, it is unclear why this is important (no reference is given), especially considering the benefits of lower NH<sub>x</sub> deposition and the existence of other removal pathways (wet deposition) that may not exhibit the same sensitivity to the NH<sub>4</sub>/NH<sub>3</sub> partitioning. A longer discussion is needed given that this conclusion is highlighted in the abstract.”*

We were only focusing here on effects on dry deposition since the paper discusses relative gas and particle concentrations and we note the large differences in gas/particle deposition velocities. Discussing effects of N deposition due to wet processing is beyond the scope of this paper. However, the reviewer's point that it may be more complicated is well taken. We have modified the text to be more precise and note complicating effects of wet removal processes.

In the abstract, it has been revised to “Finally, controlling NH<sub>3</sub> emissions to increase aerosol acidity and evaporate NH<sub>4</sub>NO<sub>3</sub> will have other effects, beyond reduction of PM<sub>2.5</sub> NH<sub>4</sub>NO<sub>3</sub>,

such as increasing aerosol toxicity and potentially altering the deposition patterns of nitrogen and trace nutrients.”

In the section 3.5, “Lowering particle pH through NH<sub>3</sub> reductions will decrease overall reduced nitrogen deposition but may result in more localized oxidized nitrogen dry deposition if the lower pH results in NO<sub>3</sub><sup>-</sup> evaporation and higher HNO<sub>3</sub> concentrations. Deposition due to wet removal processes are not considered here.”

3. *“the authors focus on seasonal averages. It would be interesting to discuss whether the sensitivity of particulate matter to NH<sub>3</sub> emissions is different depending on the concentration of NO<sub>3</sub> and whether this would affect the probability distribution of PM under the different emission reduction scenarios shown in Fig. 5. This may be important for policy makers as some standards are based on 24hr averages ([https://www3.epa.gov/ttn/naaqs/standards/pm/s\\_pm\\_history.html](https://www3.epa.gov/ttn/naaqs/standards/pm/s_pm_history.html))”*

We understand the point raised. The main issue with this suggestion is that the sensitivity of particulate matter to NH<sub>3</sub> (or HNO<sub>3</sub>) emissions is directly determined by the aerosol pH. Otherwise, the sensitivity can take a wide range of values for constant NO<sub>3</sub><sup>-</sup>, as the pH can still vary considerably. We believe that this shift in approach (first looking at pH and then seeing how that affects aerosol sensitivity to emissions), is one of the most important messages of the paper. Towards that, a simpler approach, the HNO<sub>3</sub>-NO<sub>3</sub><sup>-</sup> S curve (in Section 2.3), is provided to roughly estimate the effectiveness of NH<sub>3</sub> control.

Technical comments:

4. *“p4 line 5 NH<sub>3</sub> can also enhance the in-cloud oxidation of SO<sub>2</sub> by O<sub>3</sub>. See for instance Wang (2011) or Paulot (2017)”*

Thanks for bringing attention to these references. We have revised the text to “Reduction in NH<sub>3</sub> also reduces the amount of NH<sub>4</sub><sup>+</sup> associated with sulfates and lowers the pH-dependent sulfate production rate, such as in cloud SO<sub>2</sub> oxidation by O<sub>3</sub> (Wang et al., 2011; Cheng et al., 2016; Paulot et al., 2017), and the interplay between the two species may drive much of the sensitivity of PM<sub>2.5</sub> to NH<sub>3</sub> and NO<sub>x</sub> reductions (e.g., (Vasilakos et al., 2018))”.

5. *“p17 line 15 I believe livestock emissions are likely to dominate ammonia emissions in summer.”*

We had thought that as well, but literature studies do not seem to agree. Based on Figure 7 in Zhang et al. (2018), livestock waste dominates in winter rather than summer. The annual emissions from fertilizer and livestock waste are quite similar (5.05 vs 5.31 Tg a<sup>-1</sup>).

6. *“dash black line Fig. 4 not defined”*

We apologize for this oversight. The black dash lines in the pH figures identifies the critical pH value of 3, and now has been noted in the caption.

## References

- Cheng, Y., Zheng, G., Wei, C., Mu, Q., Zheng, B., Wang, Z., . . . Su, H.: Reactive nitrogen chemistry in aerosol water as a source of sulfate during haze events in China, *Sci. Adv.*, 2, e1601530, doi: 10.1126/sciadv.1601530, 2016.
- Eddingsaas, N. C., VanderVelde, D. G., and Wennberg, P. O.: Kinetics and Products of the Acid-Catalyzed Ring-Opening of Atmospherically Relevant Butyl Epoxy Alcohols, *J. Phys. Chem. A*, 114, 8106-8113, doi: 10.1021/Jp103907c, 2010.
- Fang, T., Guo, H., Zeng, L., Verma, V., Nenes, A., and Weber, R. J.: Highly Acidic Ambient Particles, Soluble Metals, and Oxidative Potential: A Link between Sulfate and Aerosol Toxicity, *Environ. Sci. Technol.*, 51, 2611-2620, doi: 10.1021/acs.est.6b06151, 2017.
- Fountoukis, C., and Nenes, A.: ISORROPIA II: a computationally efficient thermodynamic equilibrium model for  $K^+$ - $Ca^{2+}$ - $Mg^{2+}$ - $NH_4^+$ - $Na^+$ - $SO_4^{2-}$ - $NO_3^-$ - $Cl^-$ - $H_2O$  aerosols, *Atmos. Chem. Phys.*, 7, 4639-4659, doi: 10.5194/acp-7-4639-2007, 2007.
- Fridlind, A. M., and Jacobson, M. Z.: A study of gas-aerosol equilibrium and aerosol pH in the remote marine boundary layer during the First Aerosol Characterization Experiment (ACE 1), *J. Geophys. Res.*, 105, 17325-17340, doi: 10.1029/2000jd900209, 2000.
- Guo, H., Liu, J., Froyd, K. D., Roberts, J. M., Veres, P. R., Hayes, P. L., . . . Weber, R. J.: Fine particle pH and gas-particle phase partitioning of inorganic species in Pasadena, California, during the 2010 CalNex campaign, *Atmos. Chem. Phys.*, 17, 5703-5719, doi: 10.5194/acp-17-5703-2017, 2017.
- Jang, M., Czoschke, N. M., Lee, S., and Kamens, R. M.: Heterogeneous atmospheric aerosol production by acid-catalyzed particle-phase reactions, *Science*, 298, 814-817, doi: 10.1126/science.1075798, 2002.
- Longo, A. F., Feng, Y., Lai, B., Landing, W. M., Shelley, R. U., Nenes, A., . . . Ingall, E. D.: Influence of Atmospheric Processes on the Solubility and Composition of Iron in Saharan Dust, *Environ. Sci. Technol.*, 50, 6912-6920, doi: 10.1021/acs.est.6b02605, 2016.
- Meskhidze, N., Chameides, W. L., Nenes, A., and Chen, G.: Iron mobilization in mineral dust: Can anthropogenic  $SO_2$  emissions affect ocean productivity?, *Geophys. Res. Lett.*, 30, 2085, doi: 10.1029/2003gl018035, 2003.
- Nah, T., Guo, H., Sullivan, A. P., Chen, Y., Tanner, D. J., Nenes, A., . . . Weber, R. J.: Characterization of Aerosol Composition, Aerosol Acidity and Organic Acid Partitioning at an Agriculture-Intensive Rural Southeastern U.S. Site, *Atmos. Chem. Phys. Disc.*, 1-46, doi: 10.5194/acp-2018-373, 2018.
- Nenes, A., Krom, M. D., Mihalopoulos, N., Van Cappellen, P., Shi, Z., Bougiatioti, A., . . . Herut, B.: Atmospheric acidification of mineral aerosols: a source of bioavailable phosphorus for the oceans, *Atmos. Chem. Phys.*, 11, 6265-6272, doi: 10.5194/acp-11-6265-2011, 2011.
- Paulot, F., Fan, S., and Horowitz, L. W.: Contrasting seasonal responses of sulfate aerosols to declining  $SO_2$  emissions in the Eastern U.S.: Implications for the efficacy of  $SO_2$  emission controls, *Geophys. Res. Lett.*, 44, 455-464, doi: 10.1002/2016gl070695, 2017.
- Pozzer, A., Tsimpidi, A. P., Karydis, V. A., de Meij, A., and Lelieveld, J.: Impact of agricultural emission reductions on fine-particulate matter and public health, *Atmos. Chem. Phys.*, 17, 12813-12826, doi: 10.5194/acp-17-12813-2017, 2017.
- Stockdale, A., Krom, M. D., Mortimer, R. J., Benning, L. G., Carslaw, K. S., Herbert, R. J., . . . Nenes, A.: Understanding the nature of atmospheric acid processing of mineral dusts in supplying bioavailable phosphorus to the oceans, *Proc. Natl. Acad. Sci. U.S.A.*, 113, 14639-14644, doi: 10.1073/pnas.1608136113, 2016.
- Surratt, J. D., Chan, A. W., Eddingsaas, N. C., Chan, M., Loza, C. L., Kwan, A. J., . . . Seinfeld, J. H.: Reactive intermediates revealed in secondary organic aerosol formation from isoprene, *Proc. Natl. Acad. Sci. U.S.A.*, 107, 6640-6645, doi: 10.1073/pnas.0911114107, 2010.

- Vasilakos, P., Russell, A., Weber, R., and Nenes, A.: Understanding nitrate formation in a world with less sulfate, *Atmos. Chem. Phys. Disc.*, 1-27, doi: 10.5194/acp-2018-406, 2018.
- Wang, S., Xing, J., Jang, C., Zhu, Y., Fu, J. S., and Hao, J.: Impact assessment of ammonia emissions on inorganic aerosols in East China using response surface modeling technique, *Environ. Sci. Technol.*, 45, 9293-9300, doi: 10.1021/es2022347, 2011.
- Weber, R. J., Guo, H., Russell, A. G., and Nenes, A.: High aerosol acidity despite declining atmospheric sulfate concentrations over the past 15 years, *Nat. Geosci.*, 9, 282-285, doi: 10.1038/ngeo2665, 2016.
- Young, A. H., Keene, W. C., Pszenny, A. A. P., Sander, R., Thornton, J. A., Riedel, T. P., and Maben, J. R.: Phase partitioning of soluble trace gases with size-resolved aerosols in near-surface continental air over northern Colorado, USA, during winter, *J. Geophys. Res.*, 118, 9414-9427, doi: 10.1002/jgrd.50655, 2013.
- Zhang, L., Chen, Y., Zhao, Y., Henze, D. K., Zhu, L., Song, Y., . . . Huang, B.: Agricultural ammonia emissions in China: reconciling bottom-up and top-down estimates, *Atmos. Chem. Phys.*, 18, 339-355, doi: 10.5194/acp-18-339-2018, 2018.
